# Supplementary material
Source: HighWire-hosted journal article supplement (https://erj.ersjournals.com/highwire/filestream/113639/field_highwire_adjunct_files/0/CME392february.pdf)
Supplement: CME392february.pdf [file CME392february.pdf]

# CME Credit Application Form

## (1 CME credit)

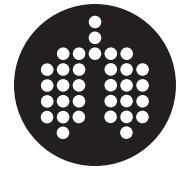

To receive CME credits, read the CME article in this issue, indicate the correct responses to the educational questions and complete the requested information. This form is also available in electronic format at [www.erj.ersjournals.com/current.dtl](http://www.erj.ersjournals.com/current.dtl). To return your application, you can either:

- use this form and return it completed to ERS Publications Office, 442 Glossop Road, Sheffield, S10 2PX, UK; fax to +44-114-2665064; or e-mail to [info@ersj.org.uk](mailto:info@ersj.org.uk)
- fill in the online form at [www.erj.ersjournals.com/current.dtl](http://www.erj.ersjournals.com/current.dtl)

Certificates will be e-mailed to the address filled in below. Please allow 4 weeks for processing.

**CME credit applications are now free of charge.**

### Applicant personal details.

ERS Membership No. (if known): ..... Date of Birth (DD/MM/YYYY): .....

Family Name: ..... First Name: .....

Mailing Address: .....

Postal Code: ..... City: ..... Country: .....

Telephone: + ..... E-mail: .....

### Educational questions.

**"Rapid early weight gain is associated with wheeze and reduced lung function in childhood"**

**1. Which of the following statements is incorrect?**

- Rapid early weight gain is associated with obesity in childhood.  Rapid early length gain is not associated with wheezing illnesses.  
 Rapid early growth is a risk factor for type 2 diabetes.

**2. Which of the following statements is true?**

- That the association between rapid early weight gain and wheezing illnesses was found in both subgroups after stratification for birth weight implies that the association is dependent of birth weight.  Barker's hypothesis implies that rapid compensatory growth after birth is the cause of chronic conditions later in life.  The acquisition of adipose tissue can be an explanation of the association between rapid early weight gain and wheezing illnesses, because this tissue contains adipokines and chemokines.

**3. Which of the following statements is true?**

- Almost all children experience wheezing in the first year of life.  Children with rapid weight gain experience a 37% higher rate of days with wheezing symptoms than children with normal weight gain.  Adjustment for gender makes the association between weight gain and primary care visits for wheezing less strong.

**4. Which of the following statements about lung function measurement in childhood is incorrect?**

- After stratification according to birth weight, the associations between rapid weight gain and lung function were totally different compared to the association before stratification.  Rapid early weight gain is unfavorable for lung function at the age of 5 years.  Lung function measurement at the age of 5 years is difficult to perform.
